# Supplementary material for: Single-Dose Gadoterate Meglumine for 3T Late Gadolinium Enhancement MRI for the Assessment of Chronic Myocardial Infarction: Intra-Individual Comparison with Conventional Double-Dose 1.5T MRI
Source: PubMed Central journal article supplement — Korean J Radiol. 2018 Apr 6;19(3):372–80. doi: 10.3348/kjr.2018.19.3.372 (PMC5904463; doi:10.3348/kjr.2018.19.3.372), 2018-04-06
Supplement: kjr-19-372-s001.pdf [file kjr-19-372-s001.pdf]

**Supplementary Table 1. Interobserver Agreements for Measurement of Image Quality in 1.5T and 3T Images**

|                               | 1.5T                               |                                   | 3T                                 |                                   |
|-------------------------------|------------------------------------|-----------------------------------|------------------------------------|-----------------------------------|
|                               | Mean Difference $\pm$ SD           | ICC                               | Mean Difference $\pm$ SD           | ICC                               |
| <b>Signal intensities</b>     |                                    |                                   |                                    |                                   |
| Enhanced myocardium           | 0.24 $\pm$ 5.49; <i>p</i> = 0.764  | <i>r</i> = 0.947; <i>p</i> = 0.01 | -0.08 $\pm$ 3.30; <i>p</i> = 0.860 | <i>r</i> = 0.942; <i>p</i> = 0.01 |
| Nonenhanced myocardium        | -0.03 $\pm$ 0.83; <i>p</i> = 0.812 | <i>r</i> = 0.912; <i>p</i> = 0.01 | 0.13 $\pm$ 0.94; <i>p</i> = 0.357  | <i>r</i> = 0.921; <i>p</i> = 0.01 |
| Left ventricular cavity       | -0.14 $\pm$ 1.18; <i>p</i> = 0.419 | <i>r</i> = 0.932; <i>p</i> = 0.01 | 0.07 $\pm$ 1.96; <i>p</i> = 0.802  | <i>r</i> = 0.937; <i>p</i> = 0.01 |
| Image noise                   | 0.24 $\pm$ 0.19; <i>p</i> = 0.376  | <i>r</i> = 0.967; <i>p</i> = 0.01 | 0.01 $\pm$ 0.14; <i>p</i> = 0.509  | <i>r</i> = 0.961; <i>p</i> = 0.01 |
| <b>SNR</b>                    |                                    |                                   |                                    |                                   |
| SNR <sub>enhanced</sub>       | -0.27 $\pm$ 5.00; <i>p</i> = 0.707 | <i>r</i> = 0.898; <i>p</i> = 0.01 | -0.63 $\pm$ 4.57; <i>p</i> = 0.344 | <i>r</i> = 0.873; <i>p</i> = 0.01 |
| SNR <sub>normal</sub>         | -0.02 $\pm$ 0.54; <i>p</i> = 0.788 | <i>r</i> = 0.845; <i>p</i> = 0.01 | -0.10 $\pm$ 0.86; <i>p</i> = 0.411 | <i>r</i> = 0.817; <i>p</i> = 0.01 |
| SNR <sub>LVC</sub>            | -0.41 $\pm$ 2.95; <i>p</i> = 0.344 | <i>r</i> = 0.865; <i>p</i> = 0.01 | -0.33 $\pm$ 2.21; <i>p</i> = 0.311 | <i>r</i> = 0.881; <i>p</i> = 0.01 |
| <b>CNR</b>                    |                                    |                                   |                                    |                                   |
| CNR <sub>infarct-normal</sub> | -0.25 $\pm$ 4.65; <i>p</i> = 0.710 | <i>r</i> = 0.919; <i>p</i> = 0.01 | -0.53 $\pm$ 4.13; <i>p</i> = 0.381 | <i>r</i> = 0.874; <i>p</i> = 0.01 |
| CNR <sub>infarct-LVC</sub>    | 0.13 $\pm$ 3.28; <i>p</i> = 0.778  | <i>r</i> = 0.889; <i>p</i> = 0.01 | -0.30 $\pm$ 3.52; <i>p</i> = 0.554 | <i>r</i> = 0.895; <i>p</i> = 0.01 |

CNR = contrast-to-noise ratio, ICC = intraclass correlation coefficient, SD = standard deviation, SNR = signal-to-noise ratio
