# Supplementary material for: Single-Dose Gadoterate Meglumine for 3T Late Gadolinium Enhancement MRI for the Assessment of Chronic Myocardial Infarction: Intra-Individual Comparison with Conventional Double-Dose 1.5T MRI
Source: PubMed Central journal article supplement — Korean J Radiol. 2018 Apr 6;19(3):372–80. doi: 10.3348/kjr.2018.19.3.372 (PMC5904463; doi:10.3348/kjr.2018.19.3.372), 2018-04-06
Supplement: kjr-19-372-s002.pdf [file kjr-19-372-s002.pdf]

**Supplementary Table 2. Signal Intensities of Double-Dose 1.5T and Single-Dose 3T Magnetic Resonance Images (n = 16)**

|                             | 1.5T Double Dose | 3T Single Dose | <i>P</i> |
|-----------------------------|------------------|----------------|----------|
| <b>SI<sub>infarct</sub></b> |                  |                |          |
| 10 minutes                  | 63.2 ± 31.7      | 76.6 ± 23.3    | 0.297    |
| 15 minutes                  | 63.0 ± 32.3      | 79.8 ± 28.8    | 0.240    |
| 20 minutes                  | 67.0 ± 36.9      | 78.5 ± 26.4    | 0.409    |
| <b>SI<sub>normal</sub></b>  |                  |                |          |
| 10 minutes                  | 8.4 ± 4.1        | 10.5 ± 3.5     | 0.173    |
| 15 minutes                  | 8.9 ± 5.4        | 11.0 ± 4.3     | 0.204    |
| 20 minutes                  | 10.7 ± 7.8       | 12.2 ± 5.7     | 0.441    |
| <b>SI<sub>LVC</sub></b>     |                  |                |          |
| 10 minutes                  | 53.6 ± 29.5      | 47.0 ± 26.9    | 0.569    |
| 15 minutes                  | 47.5 ± 29.5      | 45.4 ± 24.6    | 0.852    |
| 20 minutes                  | 49.2 ± 27.9      | 41.1 ± 22.2    | 0.430    |

Data are presented as means ± SDs. SI = signal intensity
